# Supplementary material for: Natural History and Exploitation of the Harbor Porpoise (Phocoena phocoena Linnaeus, 1758) during the Neolithic (ca. 4000–2000 cal. BC) in the Eastern Baltic Region
Source: MDPI journal article supplement (doi:10.3390/ani13050909), 2023-03-02
Supplement: s1 [file s1]

## Supplementary

**Table S1.** Data on vessels from Neolithic sites decorated with porpoise tooth impressions on the exterior.

| Archaeological site (context), years of excavation, collections                                                                                                                                                                                                                                                        | No. of vessels (identified from rim sherds) | No. of vessels with porpoise tooth decoration on exterior | %     | Notes                                                                                                                            |
|------------------------------------------------------------------------------------------------------------------------------------------------------------------------------------------------------------------------------------------------------------------------------------------------------------------------|---------------------------------------------|-----------------------------------------------------------|-------|----------------------------------------------------------------------------------------------------------------------------------|
| Sārnate (dwellings with Early Sārnate Ware), 1938-1940; 1949; 1953-1959 excavations. Material held at National History Museum of Latvia.                                                                                                                                                                               | 19                                          | 69                                                        | 27.54 | Published in Bērziņš 2008, Table 9, as "tooth stamp" decoration (the connection with porpoise had not yet been discovered) [41]. |
| Siliņupe (area 7), 1988-1989 excavation. Material held at National History Museum of Latvia.                                                                                                                                                                                                                           | 7                                           | 75                                                        | 9.33  |                                                                                                                                  |
| Riņņukalns (vessels assigned to midden accumulation phase), 1874–1875, 1877, 1895, 1913, 1943-1944, 2011, 2017-2018 excavations. Material held at National History Museum of Latvia; Institute of History and Archaeology, Tartu University; temporarily stored at Institute of Latvian History, University of Latvia. | 5                                           | 86                                                        | 5.81  |                                                                                                                                  |

## Reference

41. Bērziņš, V. Sārnate: living by a coastal lake during the east Baltic Neolithic, *Acta Universitatis Ouluensis B, Humaniora* 86; Oulun Yliopisto: Oulu, Finland, 2008, Table 9.
